# Supplementary figures and images for: Hypothalamic ATF3 is involved in regulating glucose and energy metabolism in mice
Source: PubMed Central journal article supplement — Diabetologia. 2013 Mar 6;56(6):1383–93. doi: 10.1007/s00125-013-2879-z (PMC3648686; doi:10.1007/s00125-013-2879-z), 2013-03-06

**a**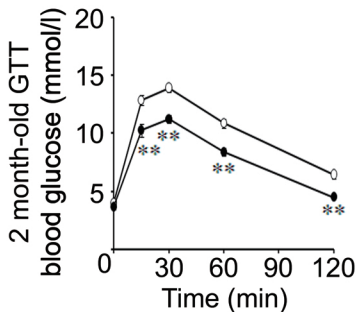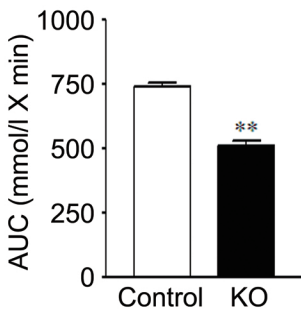**b**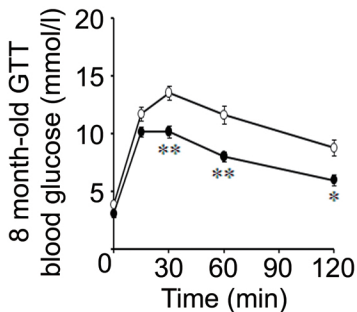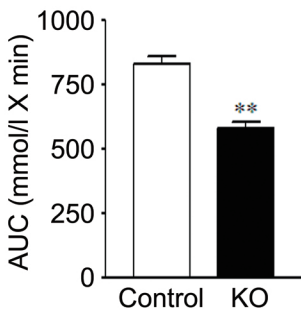

ESM Fig. 1

Supplement: 125_2013_2879_MOESM1_ESM.pdf [file 125_2013_2879_MOESM1_ESM.pdf]
