# Supplementary figures and images for: Hypothalamic ATF3 is involved in regulating glucose and energy metabolism in mice
Source: Springer Nature journal article supplement (doi:10.1007/s00125-013-2879-z), 2013-03-05

**a**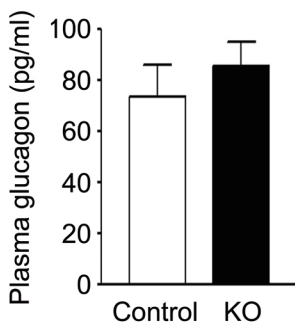**b**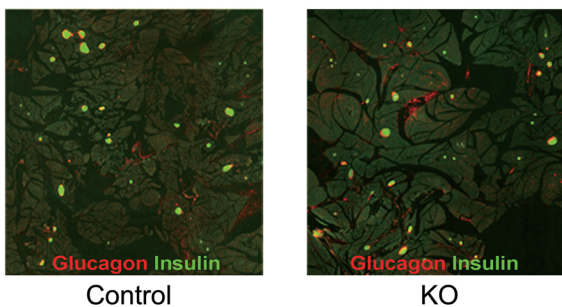**c**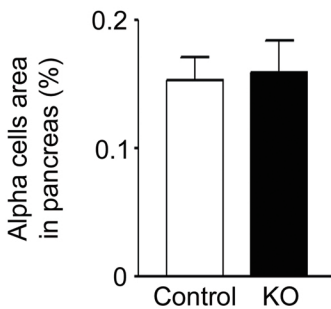**d**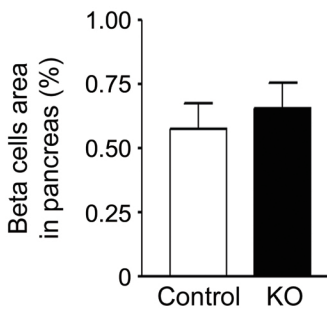**e**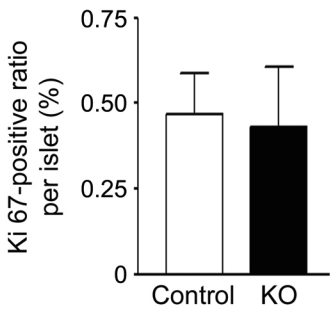**f**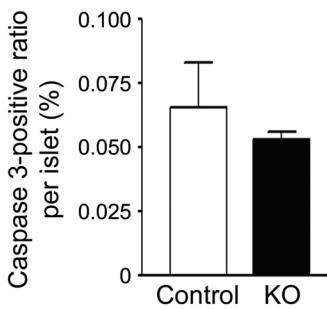

Supplement: MOESM2 [file 8091510]

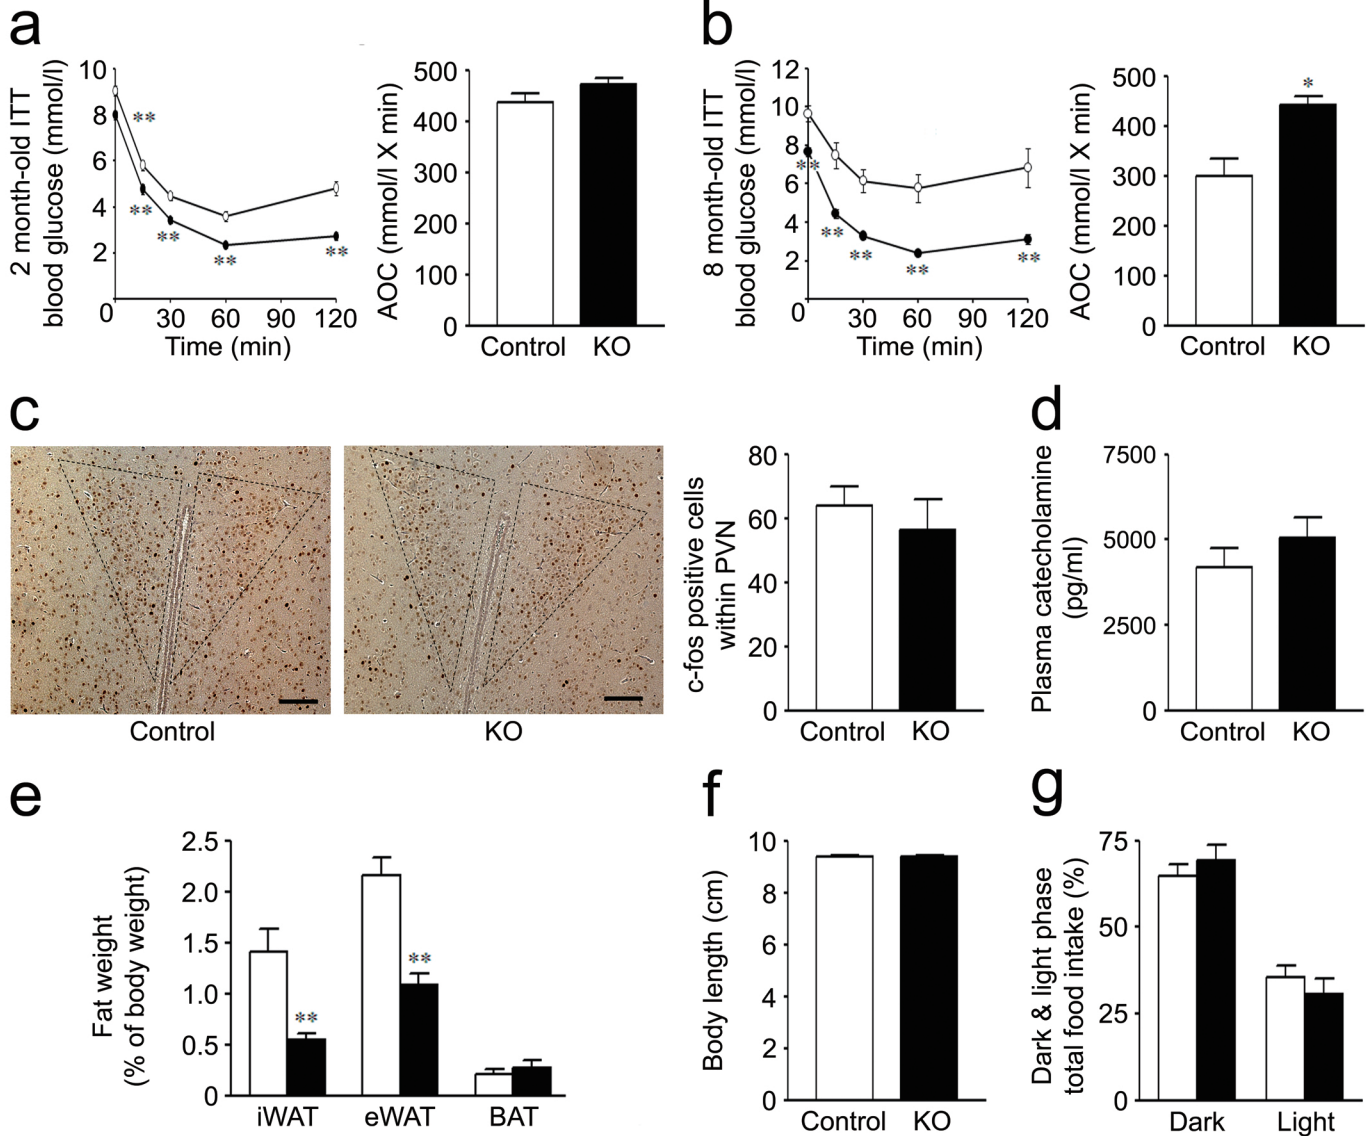

ESM Fig. 3

Supplement: MOESM3 [file 8091510]

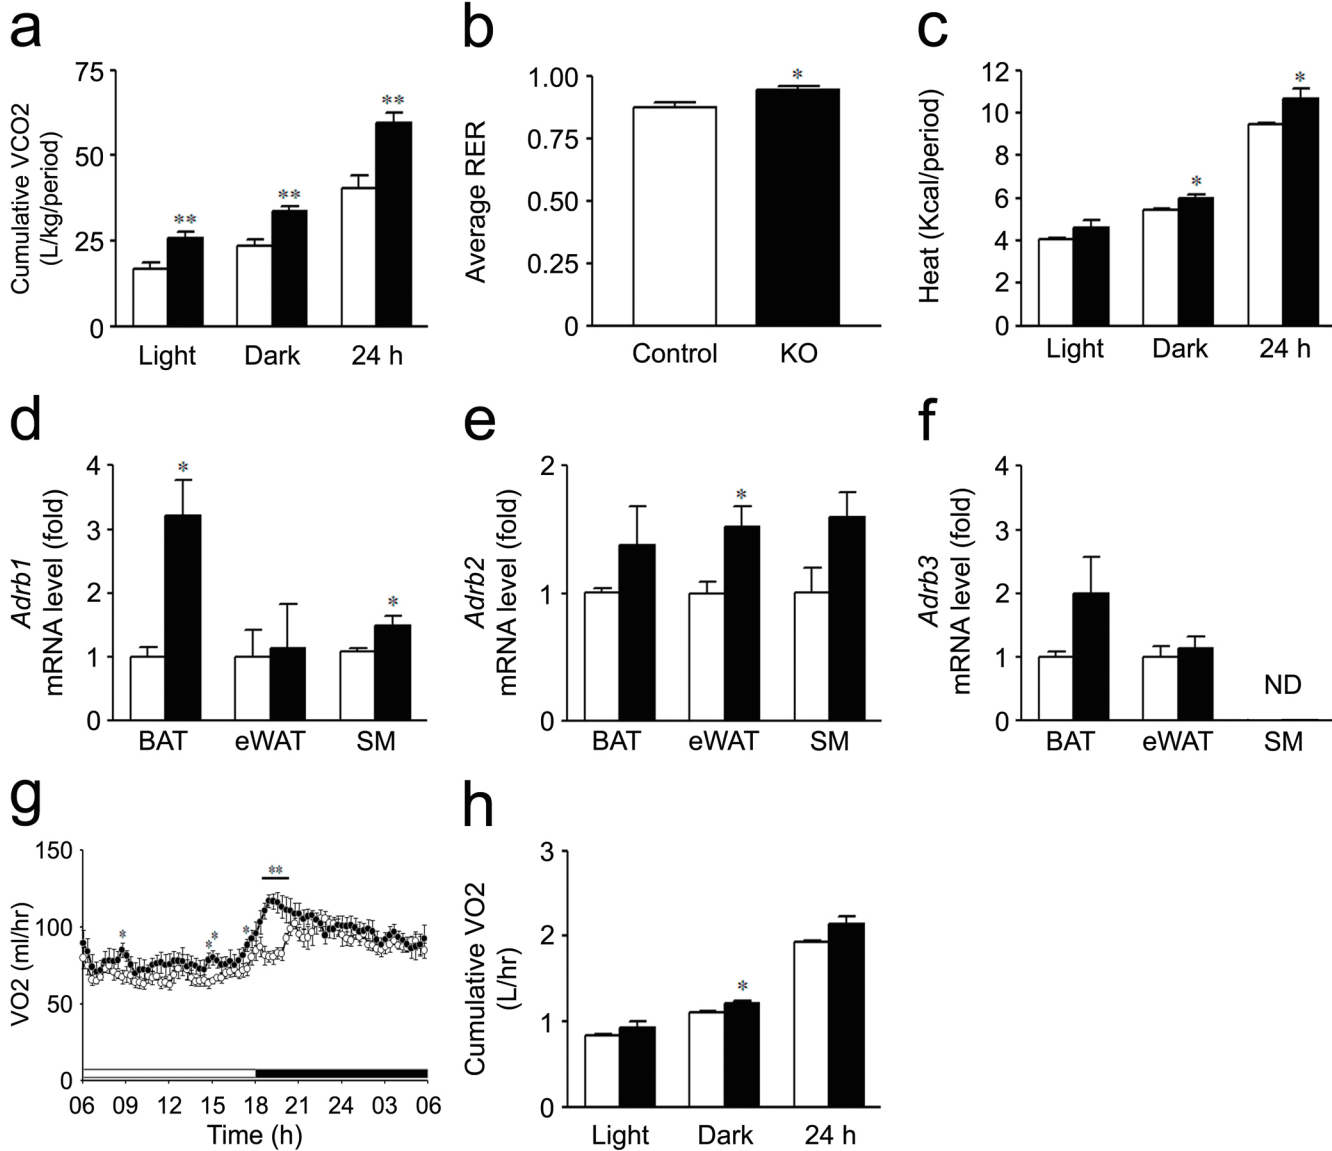

ESM Fig. 4

Supplement: MOESM4 [file 8091510]

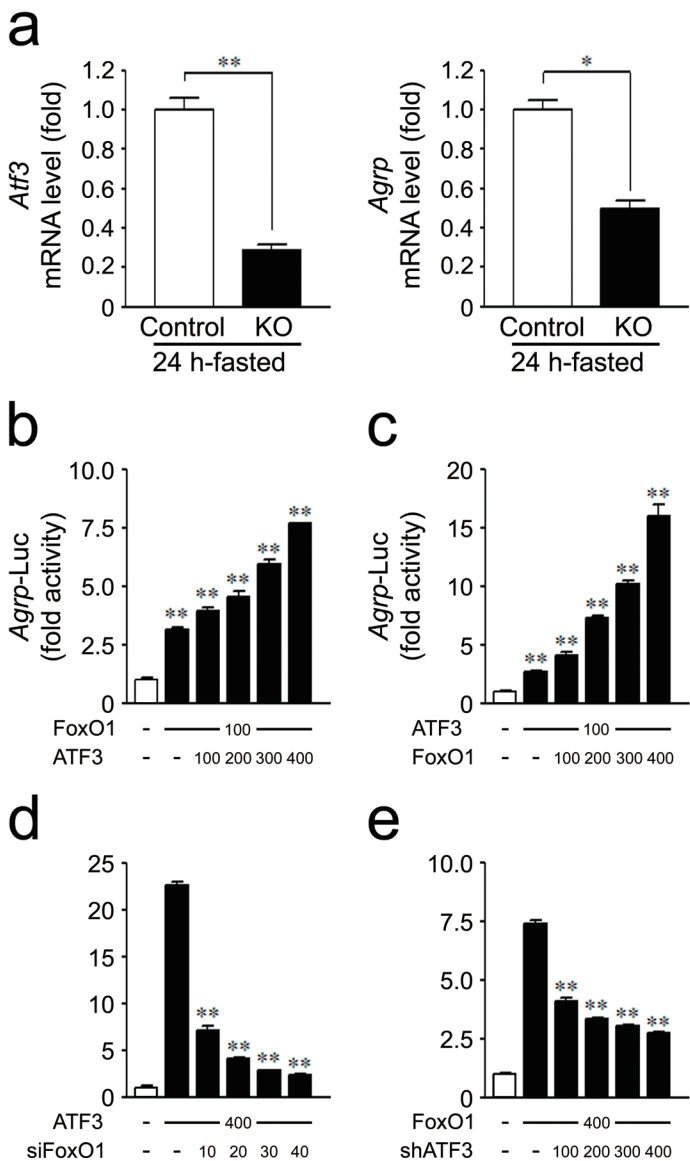

ESM Fig. 5

Supplement: MOESM5 [file 8091510]
